# Supplementary material
Source: PubMed Central journal article supplement (PMC8771579)

Appendix 1: Diagnostic plots for the final vancomycin model. Observed vs. population (left) and individual (right) predicted plots.

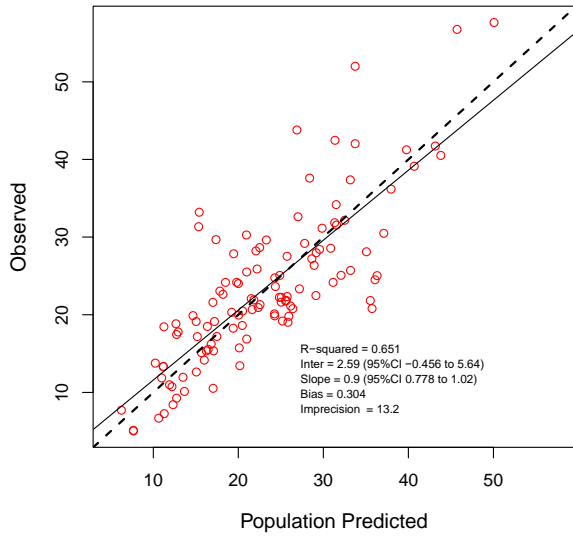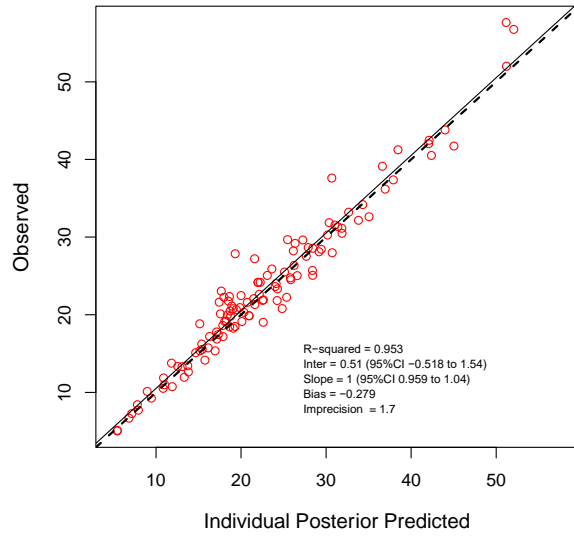

Appendix 2: Relative model log-likelihood, Akaike Information Criterion and Bayesian Information Criterion values

| <b>Model Description</b>                           | <b>-2*LL</b> | <b>AIC</b> | <b>BIC</b> |
|----------------------------------------------------|--------------|------------|------------|
| 1-compartment                                      | 1270.1       | 1276.2     | 1285.9     |
| 2-compartment                                      | 1195.9       | 1206       | 1222.2     |
| 2-compartment with CrCL                            | 1163.8       | 1176       | 1195.4     |
| 2-compartment with CrCL and Weight                 | 1159.9       | 1172       | 1191.4     |
| 2-compartment with CrCL, RRT and BMI               | 1130.7       | 1143       | 1162.2     |
| 2-compartment with CrCL, RRT, Weight and ECMO mode | 742.1        | 757        | 775.9      |
| 2-compartment with CrCL, RRT and Weight            | 507.4        | 522.5      | 540.6      |

### Appendix 3: Model file

#Pri

Cl,0.1, 10.2

Clrrt,0,1

V, 0.5, 80

IC2, 0.1,9300

Kcp,0,8.2

Kpc,0,14

#COV

IC

WT

RRT1

CrCl

#INI

$X(1) = IC * V_w$

$X(2) = IC2$

#Sec

$C_{ln} = Cl * (CrCl / 77)$

&IF (RRT1.eq.1) THEN  $C_{ln} = Clrrt$

$V_w = V * (WT / 80) ** 0.75$

$Ke = C_{ln} / V_w$

#Out

$Y(1) = X(1) / V_w$

#Err

G=3

1.5,0.2,0,0

Appendix 4: Spaghetti plot of observed concentration data with posteriors versus time on a semi-log scale stratified by RRT status.

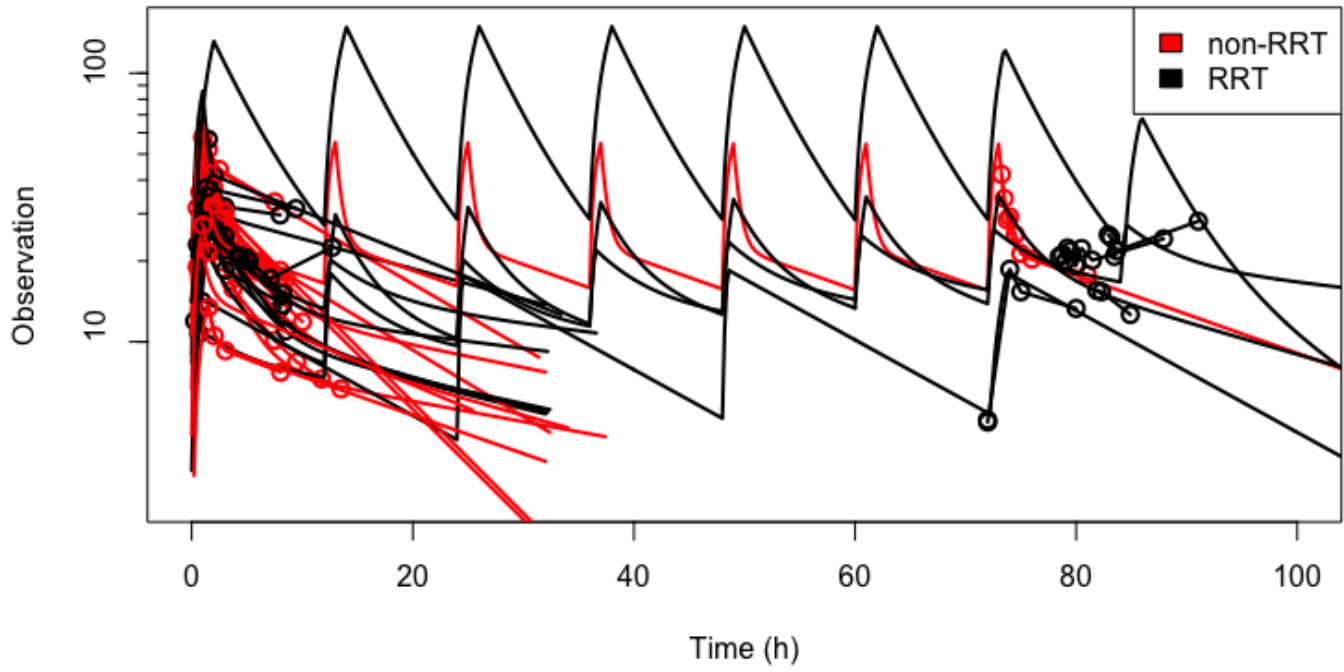

Supplement: aac.01377-21-s0001.pdf [file aac.01377-21-s0001.pdf]
